# Supplementary material for: Antimicrobial Activity of Selected Medicinal Plants from a Sub-Saharan African Country against Bacterial Pathogens from Post-Operative Wound Infections
Source: Med Sci (Basel). 2021 Mar 31;9(2):23. doi: 10.3390/medsci9020023 (PMC8103275; doi:10.3390/medsci9020023)
Supplement: Supplementary file 1 [file medsci-09-00023-s001.xlsx]

## Sheet: File 3
								Supplementary file
	Table S1. Antibiotic Susceptibility pattern for Pseudomonas aeroginosa isolates
Sample No.	Organism		Antibiogram
		GEN	AMK	CIP	LEV	CAZ	MEM	TZP	FEP	CL
74	Pseudomonas aeroginosa	R	S	S	S	R	R	R	R	R
75	Pseudomonas aeroginosa	S	S	S	S	R	R	R	R	R
82	Pseudomonas aeroginosa	R	S	S	S	R	R	R	S	R
183	Pseudomonas aeroginosa	R	R	R	R	R	R	R	R	R
187	Pseudomonas aeroginosa	R	R	S	R	R	S	R	R	R
191	Pseudomonas aeroginosa	S	R	S	S	S	R	S	S	S
196	Pseudomonas aeroginosa	R	R	R	R	R	S	R	R	R
225	Pseudomonas aeroginosa	S	R	S	S	S	S	S	R	R
236	Pseudomonas aeroginosa	S	R	S	S	R	R	S	R	R
251	Pseudomonas aeroginosa	R	R	R	R	S	R	R	R	R
253	Pseudomonas aeroginosa	R	R	R	R	R	R	R	R	R
294	Pseudomonas aeroginosa	R	R	S	S	S	R	R	R	R
295	Pseudomonas aeroginosa	S	S	S	S	R	R	S	S	R
306	Pseudomonas aeroginosa	R	R	R	R	R	R	R	R	R
307	Pseudomonas aeroginosa	R	R	S	S	R	R	R	R	S
327	Pseudomonas aeroginosa	S	R	S	S	S	S	S	R	R
346	Pseudomonas aeroginosa	R	R	S	S	R	R	R	R	R
362	Pseudomonas aeroginosa	S	S	S	S	R	R	R	R	R
390	Pseudomonas aeroginosa	R	R	R	R	R	R	R	R	R
	Table S2. Antibiotic Susceptibility pattern for Escherichia coli isolates
Sample No.	Organism		Antibiogram
		AMP	TET	SXT	GEN	CXM	CTX	AMK	CIP	LEV	CAZ	MEM	TZP	AMC	FEP
322	Escherichia coli	S	S	S	R	S	S	R	S	S	S	R	R	S	S
9	Escherichia coli (ESBL)	S	S	S	S	S	S	S	R	S	S	S	S	S	S
10	Escherichia coli (ESBL)	S	S	S	S	R	R	S	S	S	S	R	R	S	S
15	Escherichia coli	R	S	S	S	R	S	S	S	S	S	R	S	R	S
22	Escherichia coli (ESBL)	S	S	S	S	S	S	R	S	S	S	S	R	R	S
27	Escherichia coli	S	S	S	S	S	S	S	S	S	S	S	R	S	S
37	Escherichia coli	S	S	S	S	S	S	R	S	S	S	R	R	S	S
48	Escherichia coli (ESBL)	S	S	S	S	S	S	S	S	S	S	R	R	S	S
49	Escherichia coli	S	S	S	R	S	S	R	S	S	R	R	R	S	S
87	Escherichia coli (ESBL)	S	S	S	S	S	S	R	S	S	S	R	S	S	R
257	Escherichia coli	S	S	S	S	S	S	R	S	S	S	R	S	S	S
259	Escherichia coli	S	S	S	S	S	S	R	S	S	S	R	R	S	R
268	Escherichia coli	R	R	S	S	S	S	R	R	R	S	R	R	S	S
272	Escherichia coli	S	S	S	R	S	S	R	R	R	S	R	R	S	S
291	Escherichia coli	S	S	S	R	S	S	R	S	S	S	R	R	S	R
309	Escherichia coli	S	S	S	S	S	S	R	S	S	S	R	R	R	S
332	Escherichia coli	S	S	S	R	S	S	R	S	S	S	R	R	S	S
356	Escherichia coli	S	S	S	S	S	S	R	S	S	S	R	S	S	S
359	Escherichia coli	S	S	S	R	R	R	R	S	S	R	R	S	S	S
362	Escherichia coli	S	S	S	S	S	S	S	S	S	R	R	R	R	S
380	Escherichia coli	S	S	S	R	S	S	R	S	S	S	R	S	S	S
383	Escherichia coli	S	S	S	R	S	S	R	S	S	S	R	R	S	S
391	Escherichia coli	S	S	S	S	S	S	R	S	S	R	R	R	R	R
400	Escherichia coli	S	S	S	R	S	S	R	S	S	S	R	R	S	R
	Table S3. Antibiotic Susceptibility pattern for Staphylococcus aureus isolates
Sample No.	Organism		Antibiogram
		AMP	TET	SXT	GEN	CXM	LEV	TZP	AMC	FEP	VA	CC	TEC
20	Staphylococcus aureus	S	S	S	S	S	S	S	R	R	R	S	S
30	Staphylococcus aureus	S	S	R	R	S	S	S	R	R	R	S	R
32	Staphylococcus aureus	S	S	S	R	S	S	R	R	S	S	S	R
33	Staphylococcus aureus	S	S	S	R	R	S	R	R	R	S	R	R
36	Staphylococcus aureus	S	S	S	S	R	S	R	R	R	S	R	R
41	Staphylococcus aureus	S	R	R	S	R	R	R	R	R	R	R	S
43	Staphylococcus aureus	S	S	R	S	R	S	S	R	R	R	R	R
44	Staphylococcus aureus	S	S	R	R	R	S	R	R	R	R	R	R
54	Staphylococcus aureus	S	S	R	R	R	R	R	R	R	R	S	S
226	Staphylococcus aureus	R	S	S	R	R	R	R	R	R	R	R	R
274	Staphylococcus aureus	S	R	S	R	R	R	R	S	S	R	R	S
351	Staphylococcus aureus	S	S	R	R	S	R	S	S	S	R	R	S
	Table S4. Antibiotic Susceptibility pattern for Coagulase-negative staphylococci isolates
Sample No.	Organism		Antibiogram
		AMP	TET	SXT	GEN	CXM	CIP	PEN	EAY	VA	FOX	LZD	CC	AMC	TEC	FEP
189	Coagulase-negative staphylococci	S	S	S	S	S	S	S	S	S	S	R	S	S	R	S
195	Coagulase-negative staphylococci	S	S	S	S	S	S	S	S	R	S	R	S	S	R	S

## Sheet: File 4
		Supplementary File
		Table S5. Zones of inhibition (mm) recorded for aqueous and ethanol plant extracts against Pseudomonas aeruginosa
			P. guajava		A. cordifolia		M. charantia		M. arboreus		J. flava
Number	Sample code	Organism	Aqueous	Ethanol	Aqueous	Ethanol	Aqueous	Ethanol	Aqueous	Ethanol	Aqueous	Ethanol
1	294	Pseudomonas aeruginosa	11	0	15	18	0	20	0	0	0	0
2	74	Pseudomonas aeruginosa	6	8	14	20	0	0	0	0	0	0
3	307	Pseudomonas aeruginosa	0	13	17	18	0	0	7	0	0	0
4	346	Pseudomonas aeruginosa	0	16	21	23	0	0	5	0	0	0
5	57	Pseudomonas aeruginosa	0	13	13	18	0	0	0	0	0	0
6	82	Pseudomonas aeruginosa	0	12	14	17	0	6	0	0	0	0
7	306	Pseudomonas aeruginosa	0	0	18	15	0	0	0	0	0	0
8	362	Pseudomonas aeruginosa	0	16	17	0	0	6	0	0	0	0
9	183	Pseudomonas aeruginosa	0	7	20	18	10	0	0	0	0	0
10	295	Pseudomonas aeruginosa	6	14	16	15	12	13	0	0	0	0
11	191	Pseudomonas aeruginosa	0	9	14	18	11	6	0	0	0	0
12	225	Pseudomonas aeruginosa	15	20	18	18	8	0	0	0	7	0
13	196	Pseudomonas aeruginosa	0	0	0	17	0	0	0	0	0	0
14	327	Pseudomonas aeruginosa	9	12	0	13	0	7	0	0	0	0
15	251	Pseudomonas aeruginosa	0	16	15	17	13	11	0	0	0	0
16	75	Pseudomonas aeruginosa	0	11	15	18	0	0	0	0	0	0
17	253	Pseudomonas aeruginosa	0	0	13	19	0	0	0	0	0	0
18	390	Pseudomonas aeruginosa	0	0	13	18	12	0	0	0	0	0
19	187	Pseudomonas aeruginosa	0	17	16	10	0	13	0	0	0	0
20	236	Pseudomonas aeruginosa	0	0	14	11	17	6	0	0	0	0
		Mean	2.35	9.2	14.15	16.05	4.15	4.4	0.6	0	0.35	0
		Standard Error	1.01119	1.53999	1.19269	1.07232	1.34414	1.32268	0.419273	0	0.35	0
		Median	0	11.5	15	18	0	0	0	0	0	0
		Mode	0	0	14	18	0	0	0	0	0	0
		Standard Deviation	4.52217	6.88706	5.33385	4.79556	6.01117	5.91519	1.87504	0	1.56525	0
		Sample Variance	20.45	47.4316	28.45	22.9974	36.1342	34.9895	3.51579	0	2.45	0
		Kurtosis	2.32933	-1.3618	3.97143	6.18714	-0.859003	0.960412	8.46992	0	20	0
		Skewness	1.81371	-0.310937	-1.91696	-2.13723	0.923999	1.25819	3.04664	0	4.47214	0
		Range	15	20	21	23	17	20	7	0	7	0
		Minimum	0	0	0	0	0	0	0	0	0	0
		Maximum	15	20	21	23	17	20	7	0	7	0
		Sum	47	184	283	321	83	88	12	0	7	0
		Count	20	20	20	20	20	20	20	20	20	20
		Confidence Level(95.0%)	2.11644	3.22324	2.49632	2.24439	2.81332	2.76839	0.877548	0	0.732558	0
		Table S6. Zones of inhibition (mm) recorded for aqueous and ethanol plant extracts against Escherichia coli
			P. guajava		A. cordifolia		M. charantia		M. arboreus		J. flava
Number	Sample code	Organism	Aqueous	Ethanol	Aqueous	Ethanol	Aqueous	Ethanol	Aqueous	Ethanol	Aqueous	Ethanol
1	49	Escherichia coli	0	0	0	24	0	0	0	0	0	0
2	356	Escherichia coli	0	0	9	23	0	11	0	0	0	0
3	15	Escherichia coli	0	0	16	27	0	0	0	0	0	0
4	22	Escherichia coli	0	0	15	22	0	0	0	0	0	0
5	87	Escherichia coli	0	0	12	20	0	0	0	0	0	0
6	27	Escherichia coli	0	0	16	26	0	8	0	0	12	0
7	268	Escherichia coli	0	0	0	30	0	0	0	0	0	0
8	359	Escherichia coli	0	0	4	23	0	0	0	0	0	0
9	10	Escherichia coli	0	0	14	26	0	0	0	0	0	0
10	257	Escherichia coli	0	0	12	24	0	0	0	0	0	0
11	332	Escherichia coli	0	0	13	24	0	6	0	0	0	0
12	9	Escherichia coli	0	0	13	23	8	0	0	11	0	0
13	49	Escherichia coli	0	8	17	24	0	0	0	0	0	0
14	48	Escherichia coli	0	0	18	27	0	0	0	0	0	0
15	89	Escherichia coli	0	0	0	27	0	0	0	0	0	0
16	272	Escherichia coli	0	0	0	20	0	0	0	0	0	0
17	259	Escherichia coli	0	0	0	22	0	0	0	0	0	0
18	37	Escherichia coli	0	0	12	20	0	0	0	0	0	0
19	380	Escherichia coli	0	0	0	18	0	0	0	0	0	0
20	362	Escherichia coli	0	0	11	21	0	0	0	0	0	0
21	291	Escherichia coli	0	0	16	20	0	0	0	0	0	0
22	400	Escherichia coli	0	0	0	21	0	0	0	0	6	0
23	391	Escherichia coli	0	0	18	22	0	0	0	0	0	0
24	309	Escherichia coli	0	0	14	17	0	0	0	0	0	0
25	383	Escherichia coli	0	0	0	23	0	0	0	0	0	0
		Mean	0	0.32	9.2	22.96	0.32	1	0	0.44	0.72	0
		Standard Error	0	0.32	1.41067	0.615034	0.32	0.571548	0	0.44	0.527636	0
		Median	0	0	12	23	0	0	0	0	0	0
		Mode	0	0	0	24	0	0	0	0	0	0
		Standard Deviation	0	1.6	7.05337	3.07517	1.6	2.85774	0	2.2	2.63818	0
		Sample Variance	0	2.56	49.75	9.45667	2.56	8.16667	0	4.84	6.96	0
		Kurtosis	0	25	-1.62102	-0.0410805	25	7.05641	0	25	15.3389	0
		Skewness	0	5	-0.386113	0.23709	5	2.80609	0	5	3.88198	0
		Range	0	8	18	13	8	11	0	11	12	0
		Minimum	0	0	0	17	0	0	0	0	0	0
		Maximum	0	8	18	30	8	11	0	11	12	0
		Sum	0	8	230	574	8	25	0	11	18	0
		Count	25	25	25	25	25	25	25	25	25	25
		Confidence Level(95.0%)	0	0.660448	2.91149	1.26937	0.660448	1.17962	0	0.908115	1.08899	0
		Table S7. Zones of inhibition (mm) recorded for aqueous and ethanol plant extracts against Staphylococcus aureus
			P. guajava		A. cordifolia		M. charantia		M. arboreus		J. flava
Number	Sample code	Organism	Aqueous	Ethanol	Aqueous	Ethanol	Aqueous	Ethanol	Aqueous	Ethanol	Aqueous	Ethanol
1	20	Staphylococcus aureus	19	17	19	24	0	14	0	0	0	0
2	36	Staphylococcus aureus	20	20	0	24	12	12	0	0	13	0
3	135	Staphylococcus aureus	11	14	15	20	12	13	0	0	0	0
4	226	Staphylococcus aureus	9	18	25	24	0	13	0	0	0	10
5	189	Staphylococcus aureus	17	19	21	21	9	0	0	0	0	0
6	54	Staphylococcus aureus	19	19	26	23	15	14	9	9	11	0
7	44	Staphylococcus aureus	20	14	30	24	15	13	0	0	10	15
8	30	Staphylococcus aureus	17	17	28	26	9	15	0	0	0	0
9	41	Staphylococcus aureus	15	19	24	23	10	15	0	0	0	0
10	195	Staphylococcus aureus	10	17	23	25	14	13	0	0	11	0
11	6	Staphylococcus aureus	15	19	21	24	10	0	0	0	23	0
12	43	Staphylococcus aureus	19	18	25	24	14	12	11	0	11	0
13	16	Staphylococcus aureus	17	19	25	24	13	12	0	0	14	0
14	33	Staphylococcus aureus	17	17	20	21	10	9	0	0	0	0
15	274	Staphylococcus aureus	17	16	25	25	9	12	0	0	10	0
16	351	Staphylococcus aureus	16	18	15	23	6	11	0	0	0	0
		Mean	16.125	17.5625	21.375	23.4375	9.875	11.125	1.25	0.5625	6.4375	1.5625
		Standard Error	0.85574	0.4375	1.76511	0.397584	1.15063	1.14701	0.858778	0.5625	1.81881	1.09152
		Median	17	18	23.5	24	10	12.5	0	0	5	0
		Mode	17	19	25	24	9	12	0	0	0	0
		Standard Deviation	3.42296	1.75	7.06045	1.59034	4.60254	4.58803	3.43511	2.25	7.27524	4.36606
		Sample Variance	11.7167	3.0625	49.85	2.52917	21.1833	21.05	11.8	5.0625	52.9292	19.0625
		Kurtosis	0.164264	0.383943	5.14192	0.435587	1.02957	3.32818	5.3634	16	-0.303982	6.64338
		Skewness	-1.02194	-0.929279	-1.96039	-0.83598	-1.19315	-2.02782	2.56573	4	0.692434	2.72219
		Range	11	6	30	6	15	15	11	9	23	15
		Minimum	9	14	0	20	0	0	0	0	0	0
		Maximum	20	20	30	26	15	15	11	9	23	15
		Sum	258	281	342	375	158	178	20	9	103	25
		Count	16	16	16	16	16	16	16	16	16	16
		Confidence Level(95.0%)	1.82397	0.932509	3.76225	0.84743	2.45252	2.44479	1.83044	1.19894	3.8767	2.32651
